# Supplementary material for: Novel pyridinium based cobalt carbonyl ionic liquids: synthesis, full characterization, crystal structure and application in catalysis
Source: Royal Society of Chemistry journal article supplement (doi:10.1039/b709800f), 2007-01-01
Supplement: b709800f.pdf [file b709800f.pdf]

## Supplementary data

### Novel Pyridinium Based Cobalt Carbonyl Ionic Liquids: Synthesis, Full Characterization, Crystal Structure and Application in Catalysis

Fan-Guo Deng,<sup>a,b</sup> Bin Hu,<sup>a</sup> Wei Sun,<sup>\*a</sup> Jing Chen,<sup>a</sup> and Chun-Gu Xia<sup>\*a</sup>

<sup>a</sup> State key laboratory for Oxo Synthesis and Selective Oxidation, Lanzhou Institute of Chemical Physics, Chinese Academy of Sciences, Lanzhou, 730000, P R China. Fax: +86-931-8277088; Tel: +86-931-4968278(Wei Sun); E-mail: [wsun@lzb.ac.cn](mailto:wsun@lzb.ac.cn) (Wei Sun); [cgxia@lzb.ac.cn](mailto:cgxia@lzb.ac.cn) (Chun-Gu Xia)

<sup>b</sup> Graduate School of Chinese Academy of Sciences, Beijing, 100039, P R China.

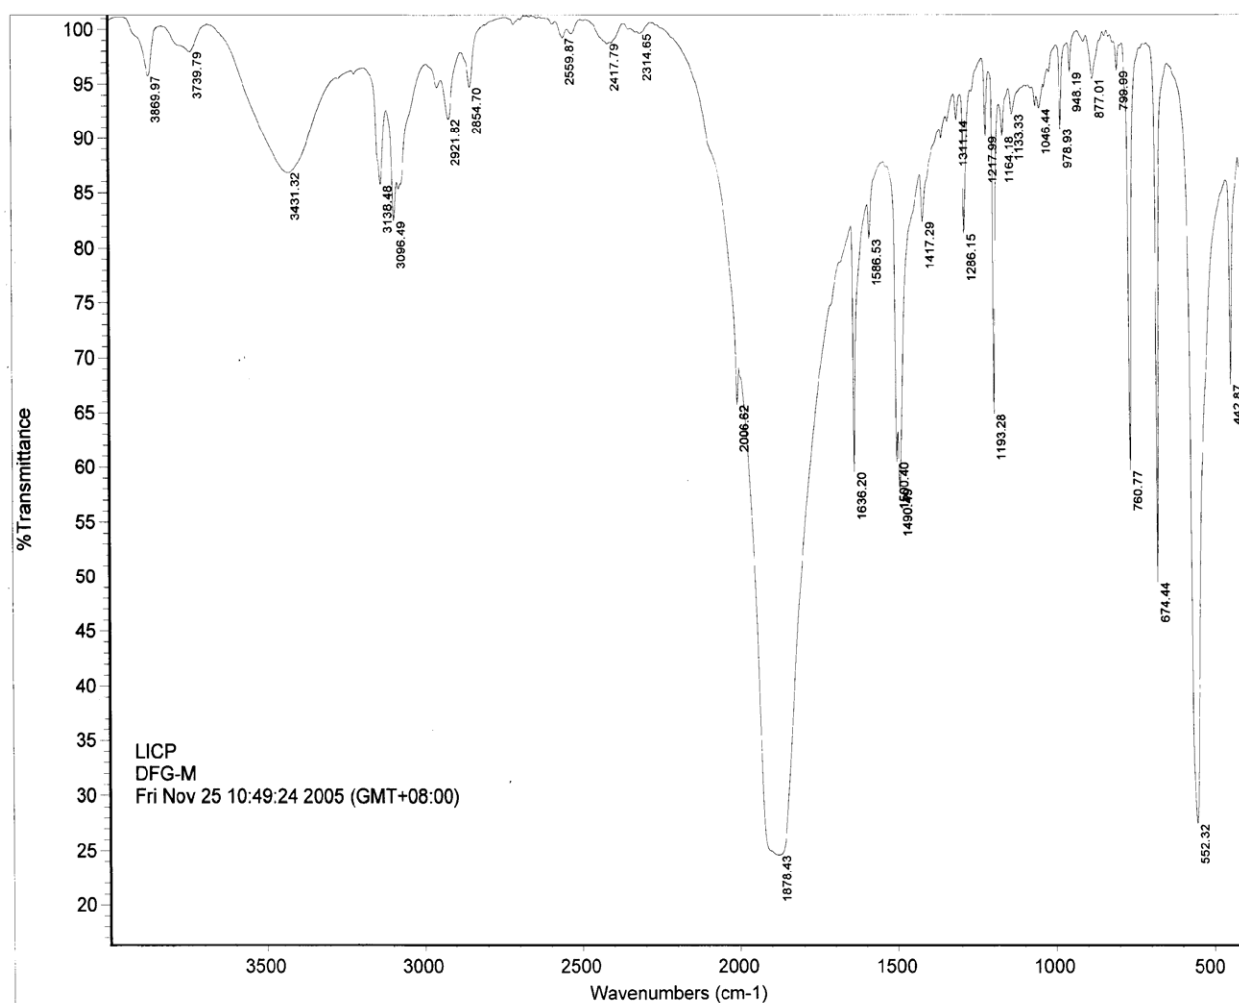

Figure 1. IR spectrum of 2a (KBr)

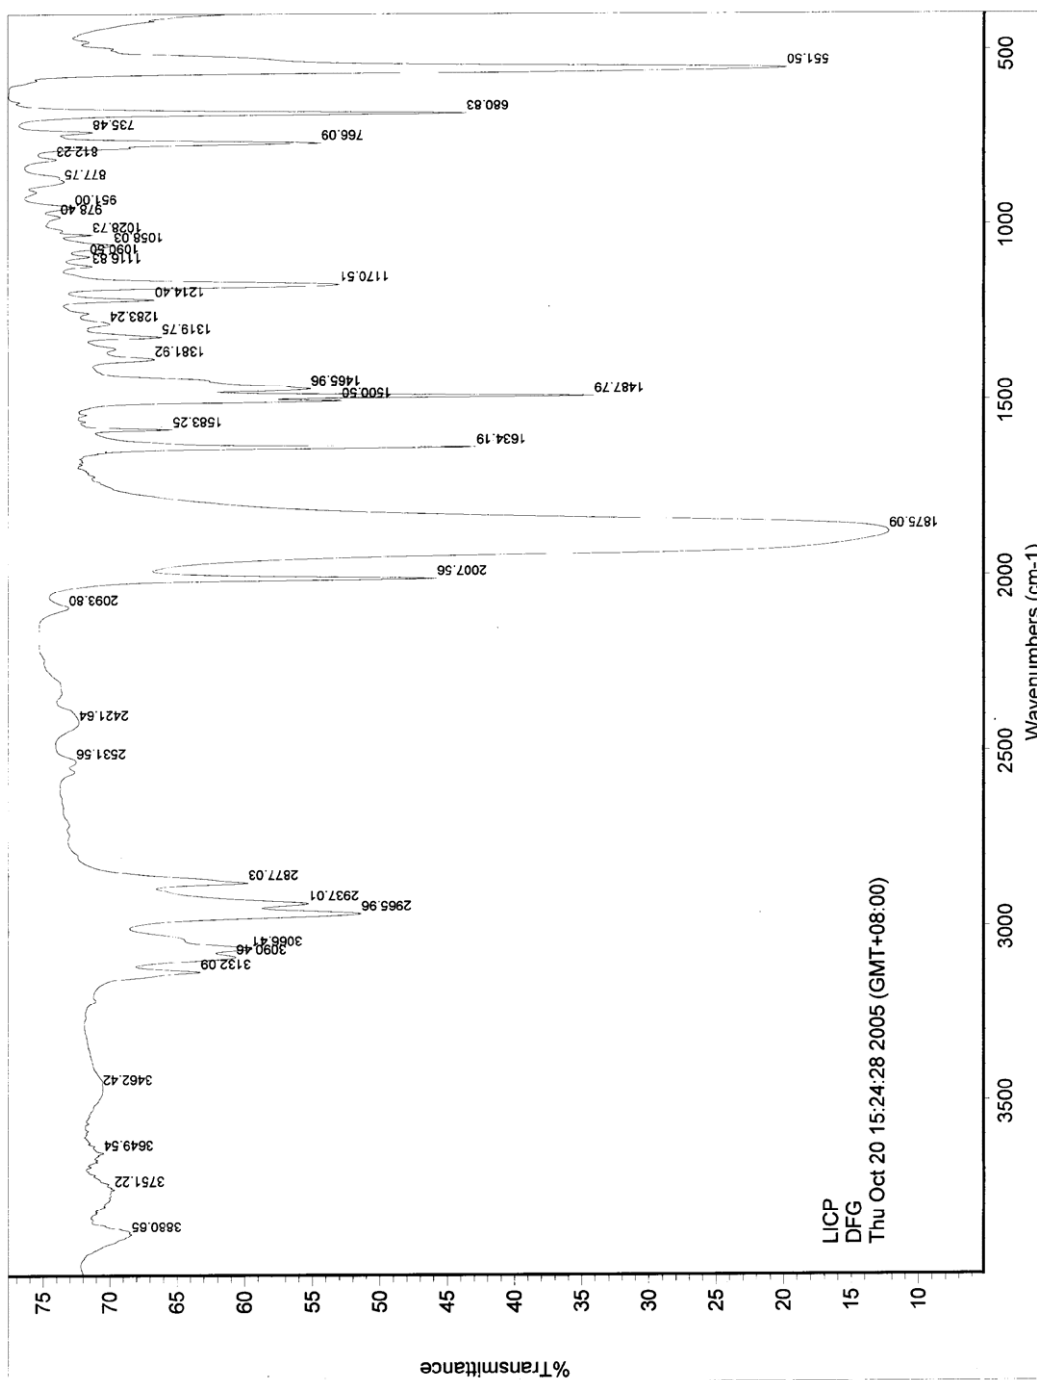

Figure 2. IR spectrum of **2b** (liquid film)

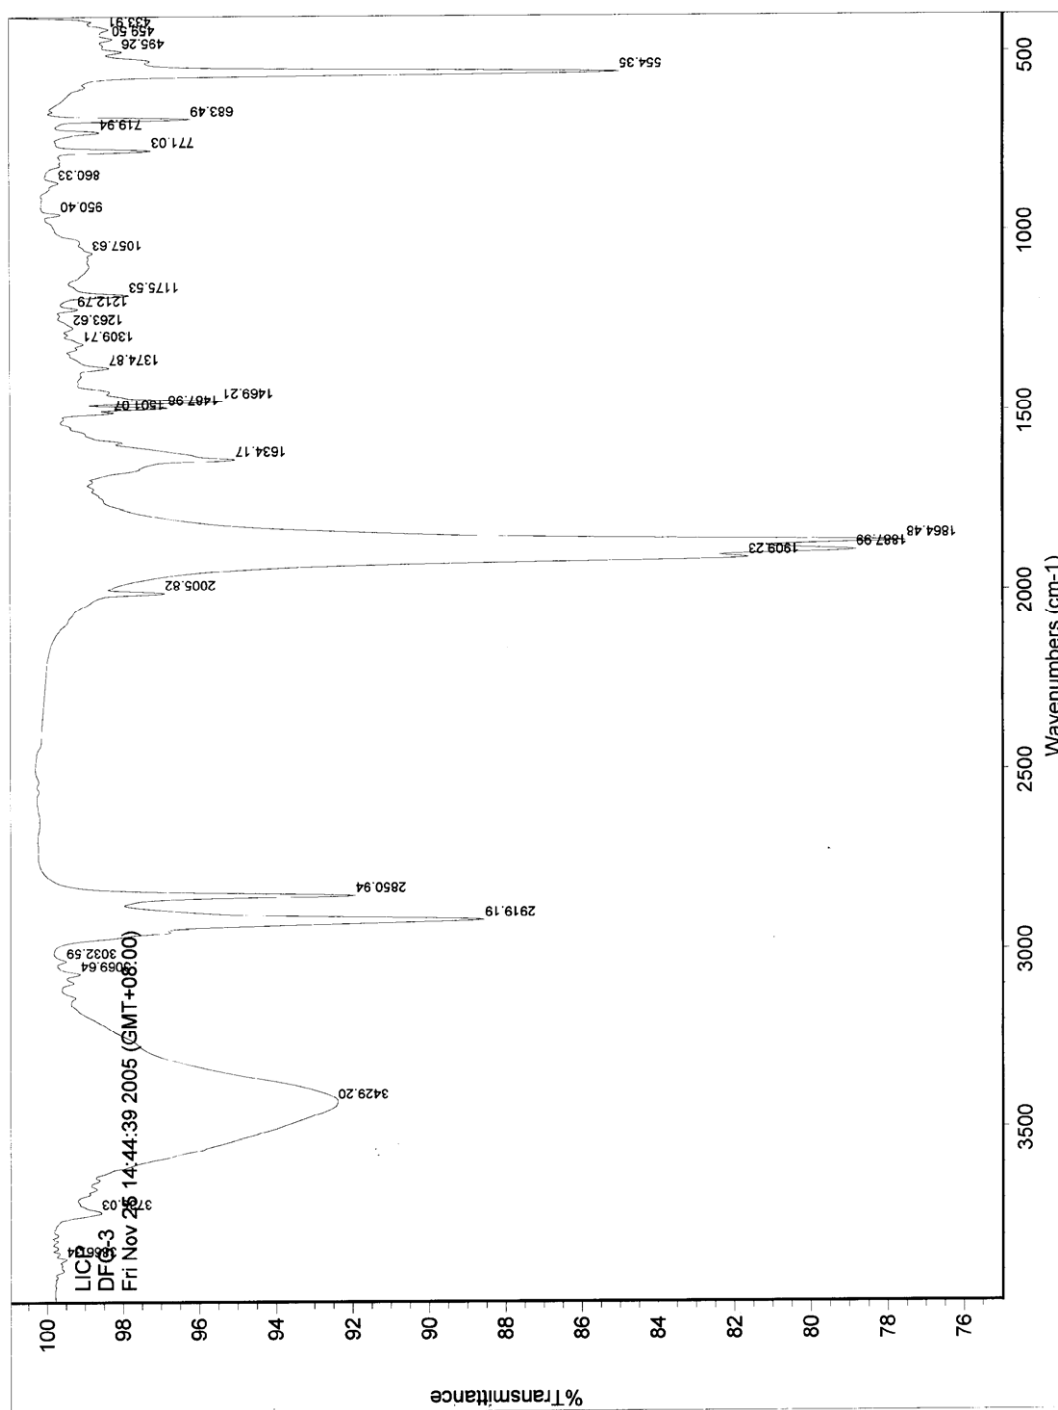

Figure 3. IR spectrum of 2c (KBr)

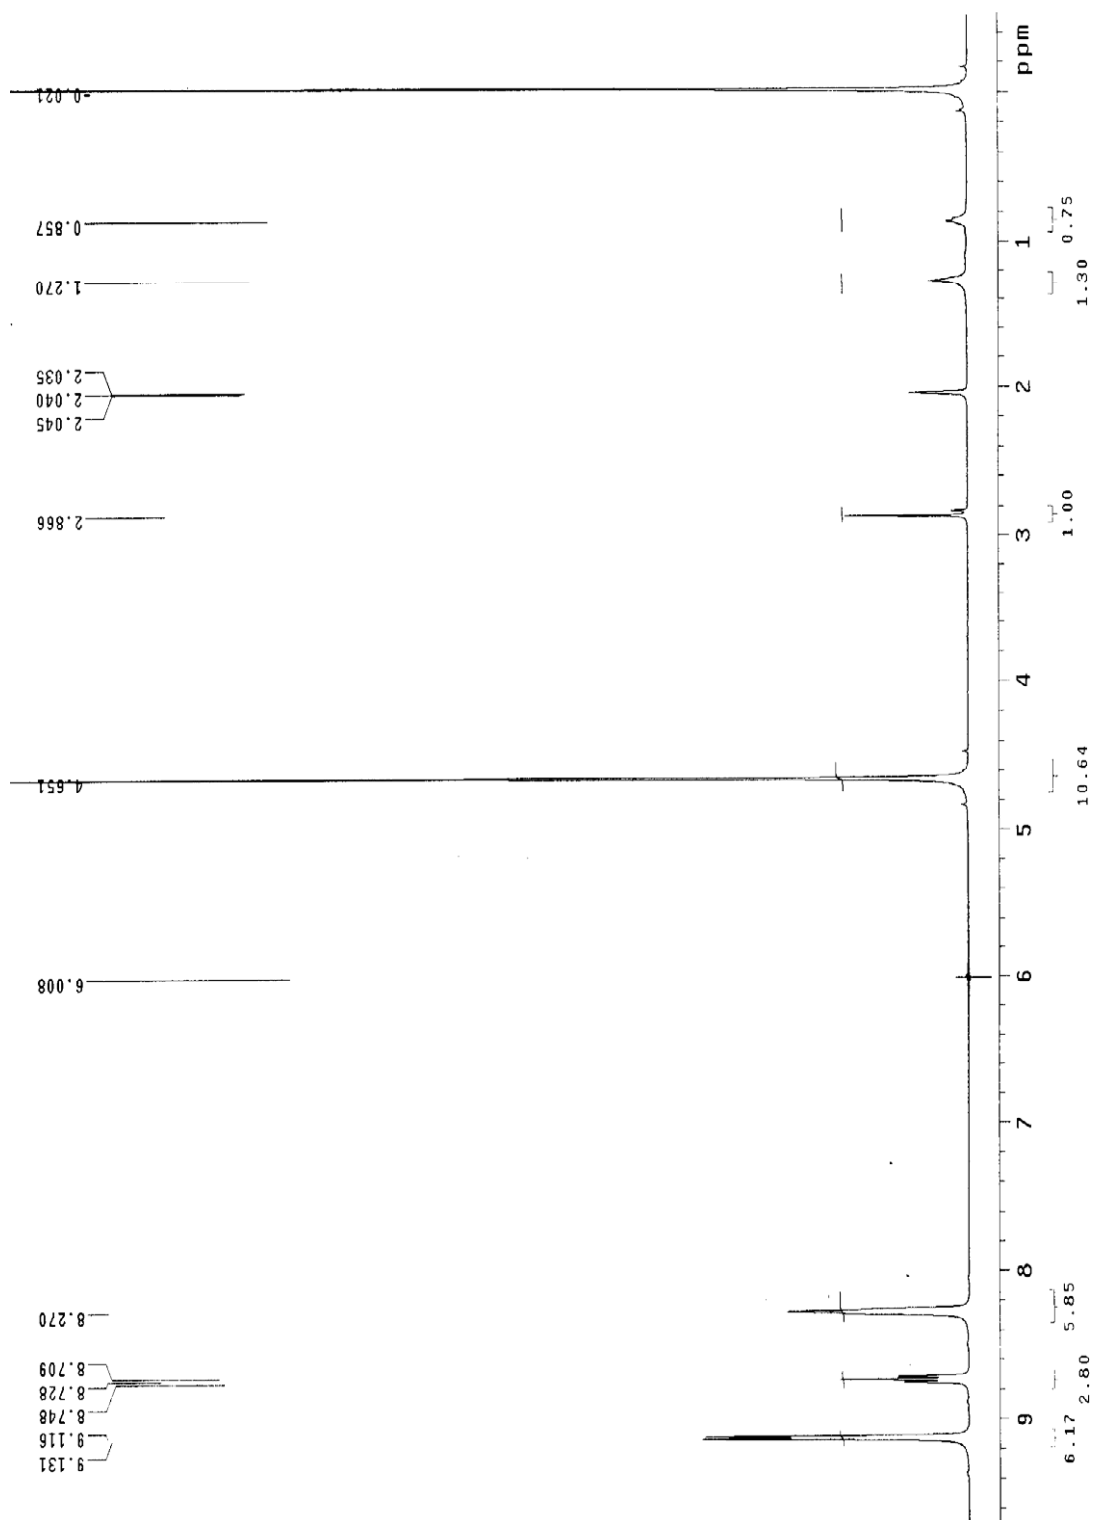

**Figure 4.**  $^1\text{H}$  NMR spectrum of **2a** (in acetone- $d_6$ )

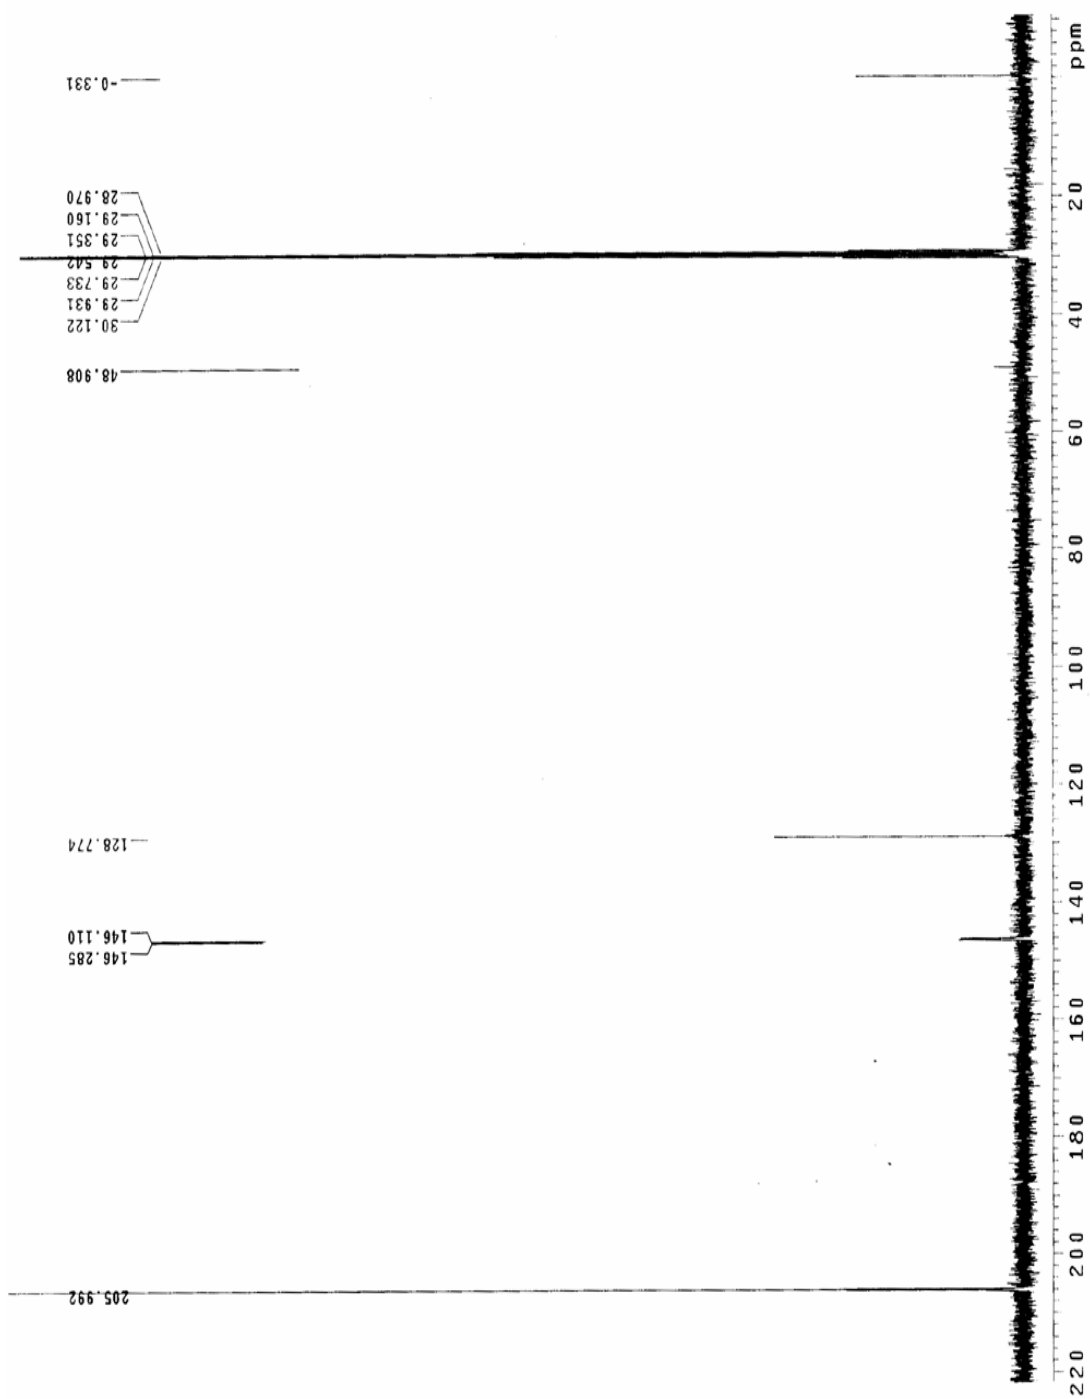

Figure 5.  $^{13}\text{C}$  NMR spectrum of 2a (in acetone- $d_6$ )

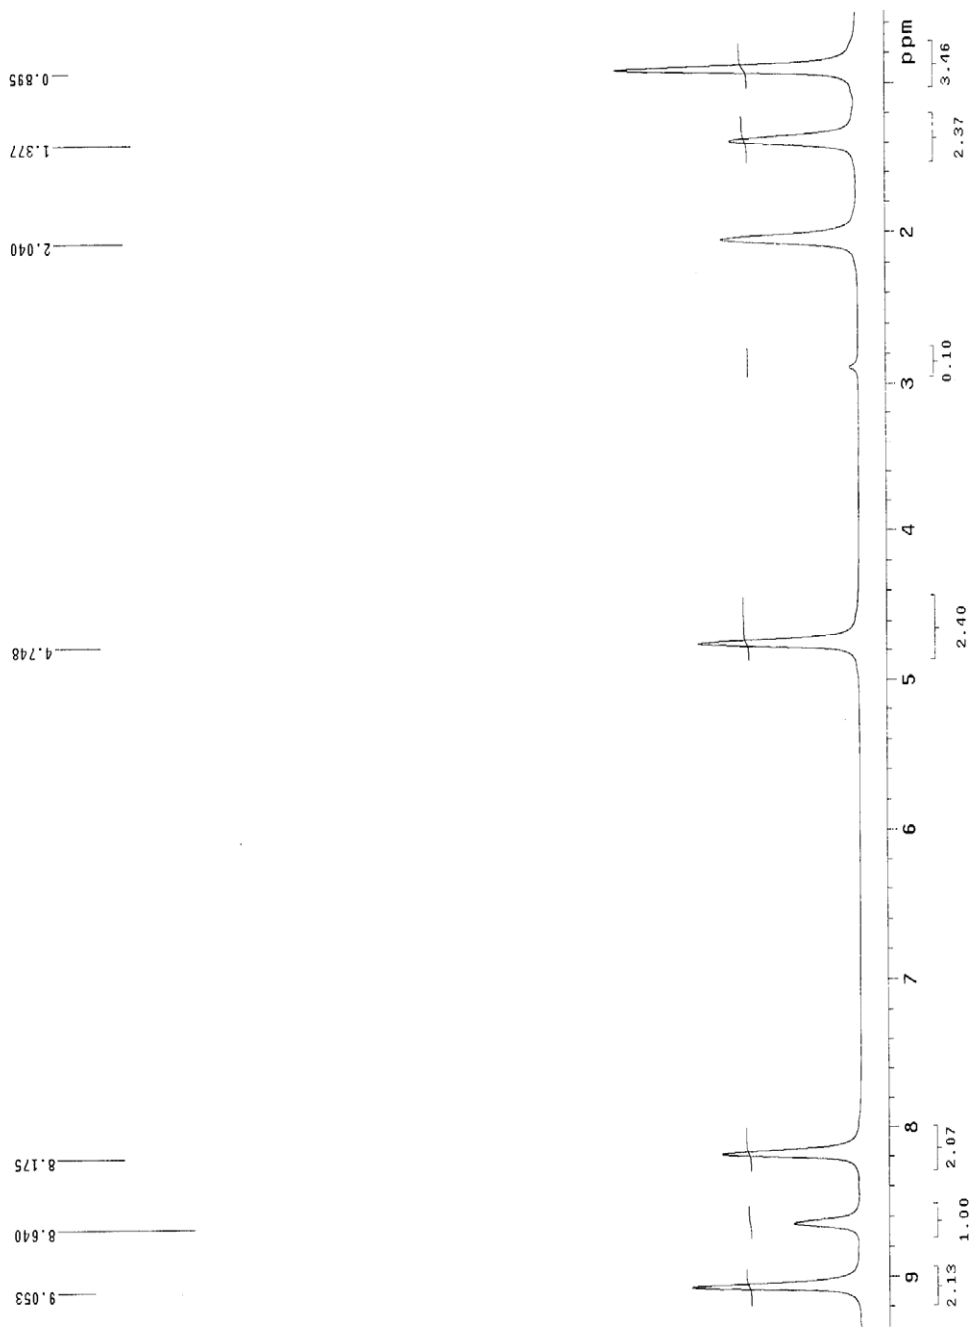

**Figure 6.**  $^1\text{H}$  NMR spectrum of **2b** (in acetone- $d_6$ )

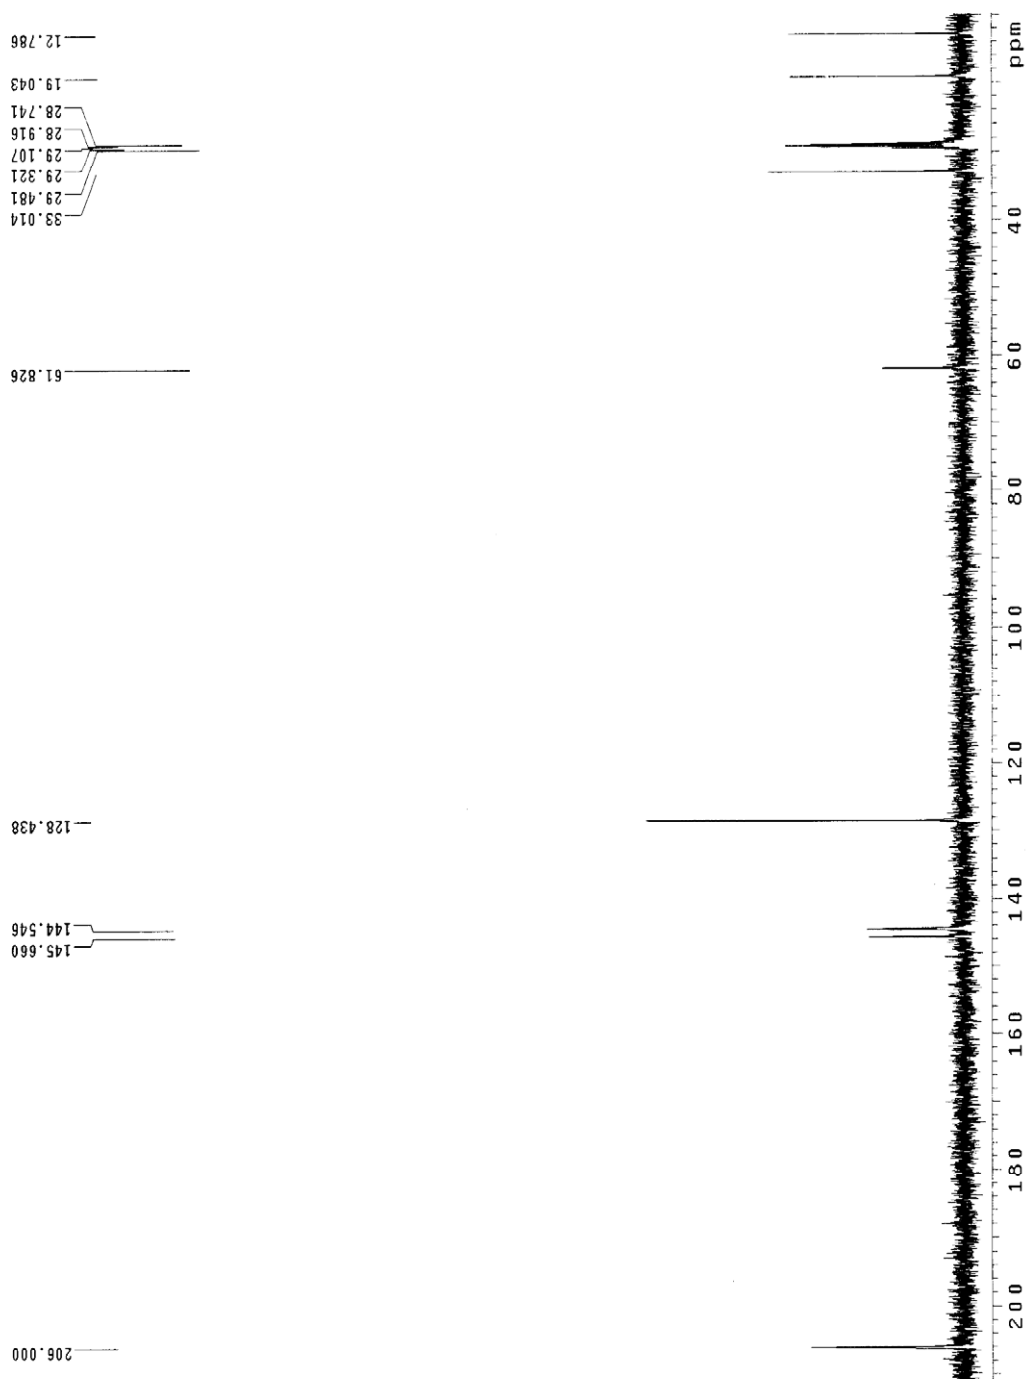

**Figure 7.**  $^{13}\text{C}$  NMR spectrum of **2b** (in acetone- $\text{d}_6$ )

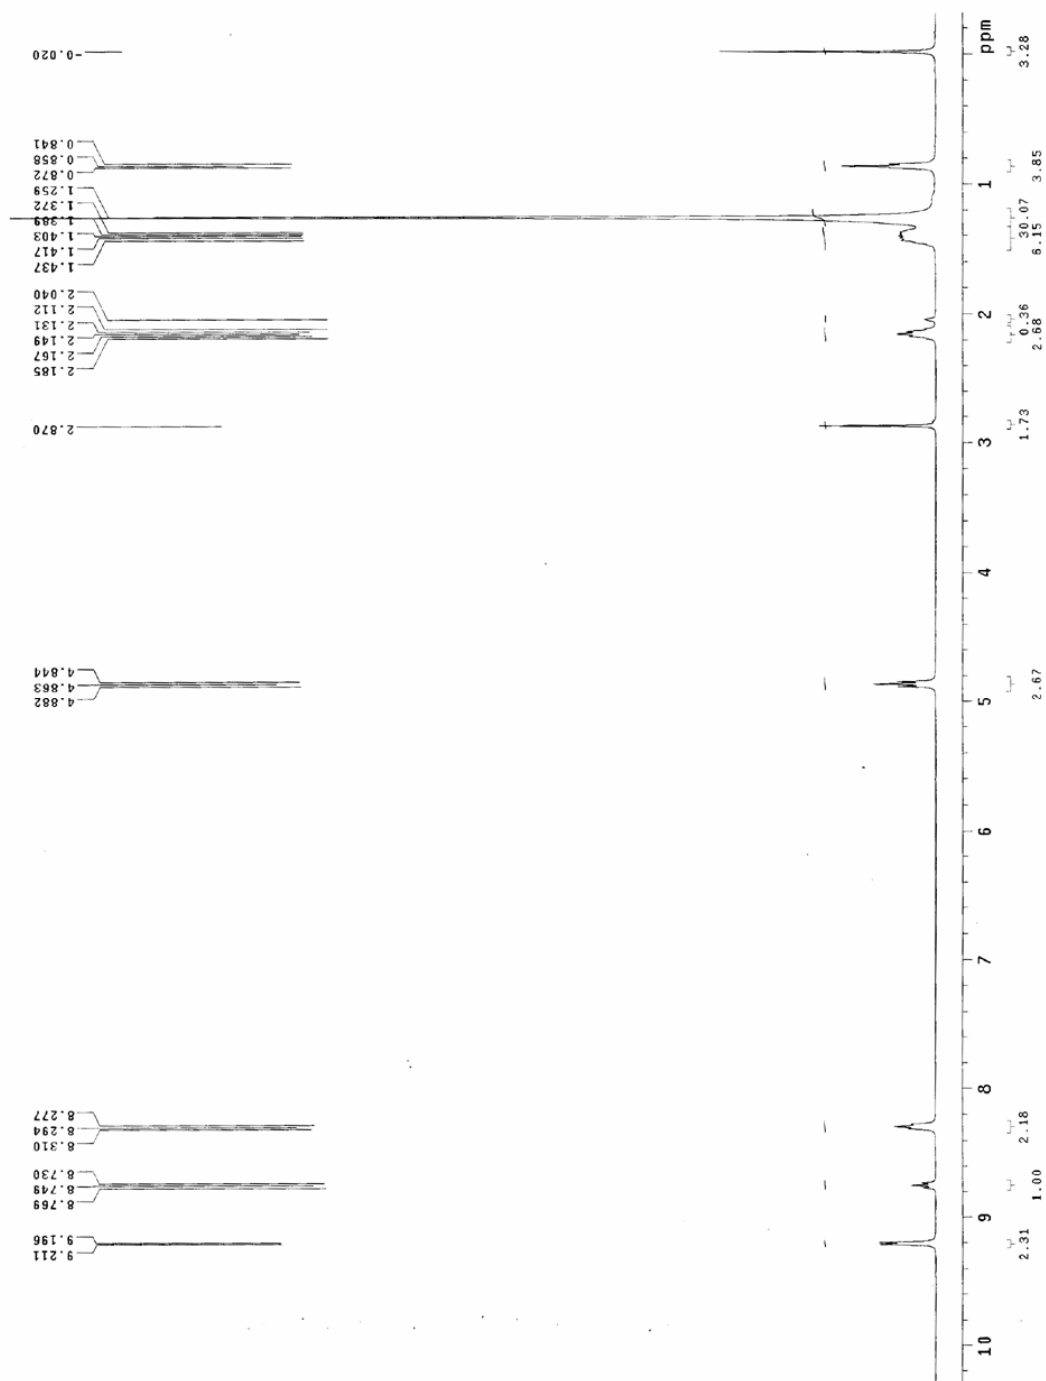

**Figure 8.**  $^1\text{H}$  NMR spectrum of **2c** (in acetone- $d_6$ )



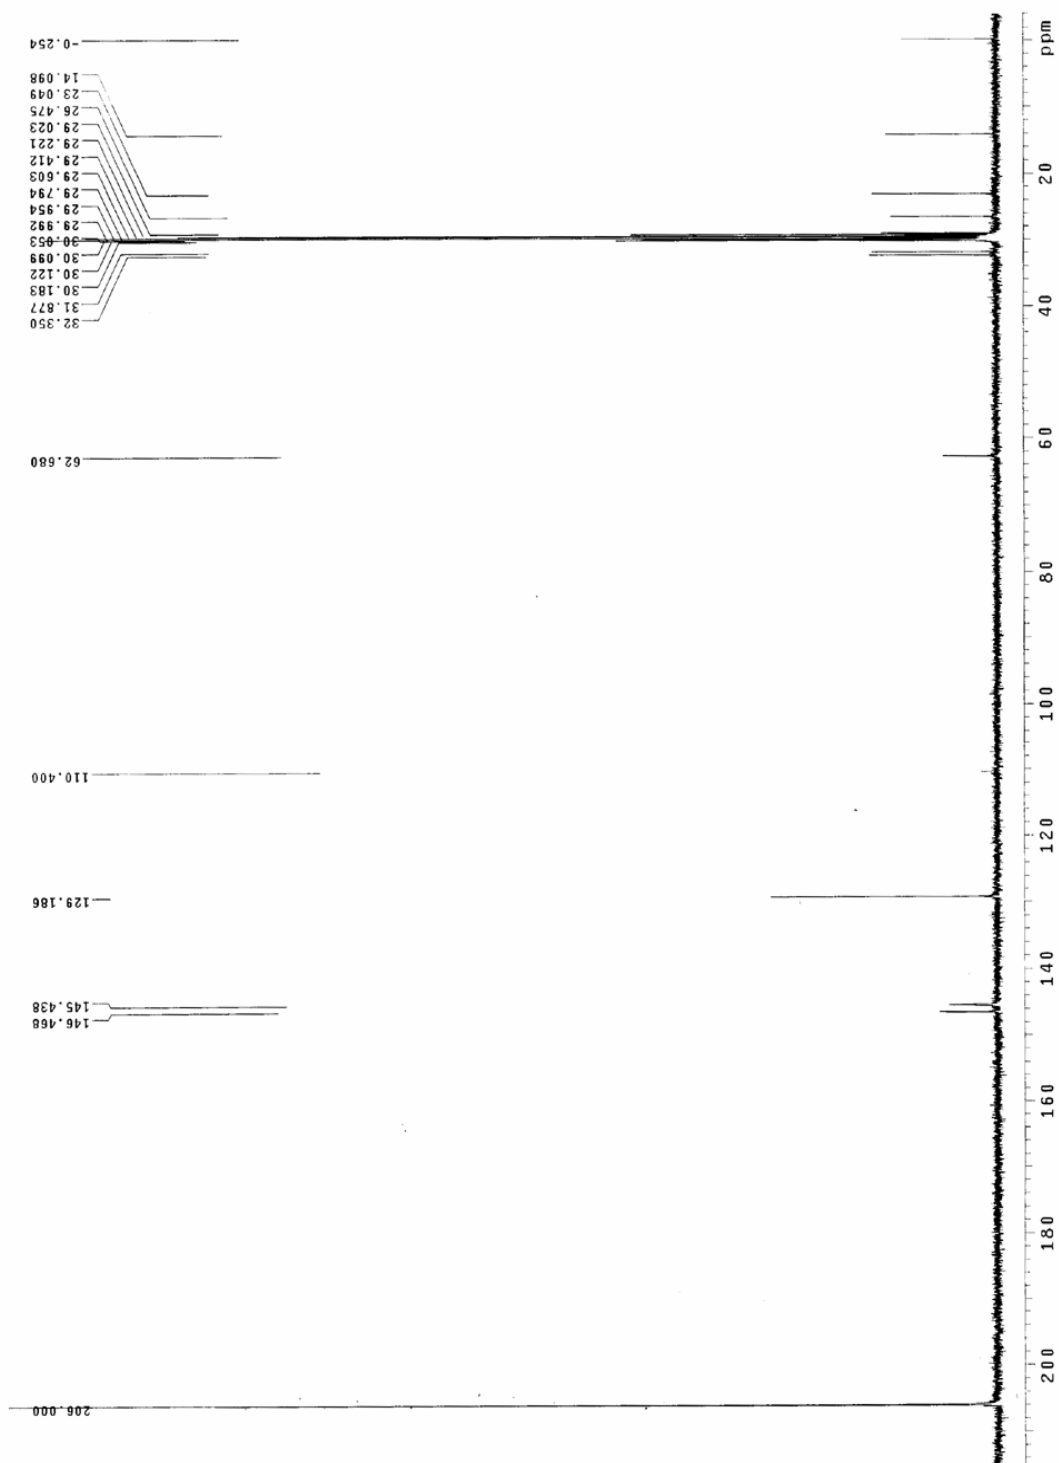

**Figure 9.**  $^{13}\text{C}$  NMR spectrum of **2c** (in acetone- $d_6$ )

### **General Procedure for the carbonylation of propylene oxide**

Under no protection of an inert atmosphere, 0.1228g (0.4mmol) of **2b** was washed three times into a clean, dry 25mL stainless steel autoclave with 4mL of methanol, followed by the addition of 0.58g propylene oxide and a magnetic bar. The autoclave was sealed, purged three times with carbon monoxide, pressurized with the desired pressure of CO and then placed in a preheated oil bath and stirred for 24h. At the end of the reaction, the reactor was cooled in a -18°C freezer for 30min, and ventilated before qualitative and quantitative analyses were carried out.
